# Supplementary material
Source: PubMed Central journal article supplement (PMC3234782)
Supplement: supp_M111.299164_jbc.M111.299164-4.pdf [file supp_M111.299164_jbc.M111.299164-4.pdf]

## Supplemental Data

**Table S2.** Accession numbers and sequence variations of NAT members homologous to XanQ

| <b>Species</b>                      | <b>gene ID</b> | <b>length (residues)</b> | <b>identity (%)</b> | <b>similarity(%)</b> | <b>gaps(%)</b> |
|-------------------------------------|----------------|--------------------------|---------------------|----------------------|----------------|
| <i>Escherichia coli str. K-12</i>   | XANQ_ECOLI     | 466/466                  | 100                 | 100                  | 0              |
| <i>Edwardsiella ictaluri</i>        | C5BEY4_EDWI9   | 472/469                  | 82                  | 90                   | 1              |
| <i>Aeromonas hydrophila</i>         | AERHH A0KK97   | 505/453                  | 79                  | 89                   | 0              |
| <i>Neisseria flavescens</i>         | C5TJD9_NEIFL   | 463/438                  | 69                  | 86                   | 0              |
| <i>Neisseria meningitidis</i>       | C6SF50_NEIME   | 463/438                  | 69                  | 86                   | 0              |
| <i>Neisseria sicca</i>              | C6M9W3_NEISI   | 463/438                  | 69                  | 87                   | 0              |
| <i>Eikenella corrodens</i>          | C0DRV2_EIKCO   | 458/441                  | 67                  | 83                   | 0              |
| <i>Neisseria gonorrhoeae</i>        | B4RL43_NEIG2   | 354/341                  | 65                  | 83                   | 1              |
| <i>Bacteroides caccae</i>           | A5ZL53_9BACE   | 438/440                  | 49                  | 68                   | 2              |
| <i>Bacteroides ovatus</i>           | A7M586_BACOV   | 437/440                  | 49                  | 68                   | 2              |
| <i>Parabacteroides distasonis</i>   | A6LC44_PARD8   | 441/440                  | 49                  | 65                   | 2              |
| <i>Bacteroides sp.</i>              | C6IL21_9BACE   | 436/440                  | 48                  | 68                   | 2              |
| <i>Bacteroides thetaiotaomicron</i> | Q89ZA4_BACTN   | 436/440                  | 48                  | 68                   | 2              |
| <i>Parabacteroides johnsonii</i>    | B7BCR2_9PORP   | 456/440                  | 48                  | 65                   | 2              |
| <i>Pseudomonas fluorescens</i>      | C3KAR9_PSEFS   | 475/439                  | 48                  | 68                   | 0              |
| <i>Bacteroides fragilis</i>         | Q64QA9_BACFR   | 441/442                  | 47                  | 66                   | 3              |
| <i>Bacteroides plebeius</i>         | B5CUV5_9BACE   | 444/436                  | 47                  | 65                   | 2              |
| <i>Parabacteroides merdae</i>       | A7AKM1_9PORP   | 456/440                  | 47                  | 66                   | 2              |
| <i>Porphyromonas gingivalis</i>     | Q7MT43_PORGI   | 445/441                  | 47                  | 65                   | 2              |
| <i>Pseudomonas fluorescens</i>      | Q3KD41_PSEPF   | 488/439                  | 47                  | 68                   | 0              |
| <i>Synechococcus sp.</i>            | B4WIL3_9SYNE   | 470/463                  | 47                  | 67                   | 0              |
| <i>Azotobacter vinelandii</i>       | C1DM49_AZOVD   | 434/413                  | 46                  | 65                   | 0              |
| <i>Bacteroides dorei</i>            | B6W3N9_9BACE   | 443/445                  | 46                  | 65                   | 2              |
| <i>Bacteroides sp.</i>              | C3R636_9BACE   | 443/445                  | 46                  | 65                   | 2              |
| <i>Bacteroides stercoris</i>        | B0NNN1_BACSE   | 439/439                  | 46                  | 66                   | 2              |
| <i>Bacteroides vulgatus</i>         | A6L3C4_BACV8   | 443/445                  | 46                  | 65                   | 2              |
| <i>Bordetella avium</i>             | Q2KYY5_BORA1   | 467/438                  | 46                  | 66                   | 0              |
| <i>Dickeya dadantii</i>             | C8QTQ0_DICDA   | 462/445                  | 46                  | 66                   | 0              |
| <i>Dickeya zeae</i>                 | C6CQ69_DICZE   | 462/442                  | 46                  | 66                   | 0              |
| <i>Erwinia carotovora</i>           | Q6DB65_ERWCT   | 462/440                  | 46                  | 66                   | 0              |
| <i>Erwinia tasmaniensis</i>         | B2VFB1_ERWT9   | 462/445                  | 46                  | 66                   | 0              |
| <i>Moritella sp.</i>                | A6FAB8_9GAMM   | 423/408                  | 46                  | 66                   | 1              |
| <i>Proteus mirabilis</i>            | B4EZA8_PROMH   | 463/440                  | 46                  | 66                   | 0              |
| <i>Providencia alcalifaciens</i>    | B6XH30_9ENTR   | 462/441                  | 46                  | 66                   | 0              |
| <i>Pseudomonas aeruginosa</i>       | B7V283_PSEA8   | 468/439                  | 46                  | 66                   | 0              |
| <i>Pseudomonas fluorescens</i>      | Q4KIR0_PSEF5   | 479/439                  | 46                  | 66                   | 0              |
| <i>Pseudomonas mendocina</i>        | A4XW01_PSEMY   | 500/439                  | 46                  | 66                   | 0              |
| <i>Pseudomonas putida</i>           | B1JBD2_PSEPW   | 459/446                  | 46                  | 66                   | 4              |
| <i>Vibrio vulnificus</i>            | Q8DDV0_VIBVU   | 467/439                  | 46                  | 68                   | 0              |
| <i>Yersinia bercovieri</i>          | C4S0H2_YERBE   | 461/440                  | 46                  | 66                   | 0              |
| <i>Yersinia enterocolitica</i>      | A1JHV2_YERE8   | 461/440                  | 46                  | 66                   | 0              |
| <i>Yersinia frederiksenii</i>       | C4SRZ9_YERFR   | 461/440                  | 46                  | 66                   | 0              |
| <i>Yersinia intermedia</i>          | C4T5T9_YERIN   | 461/440                  | 46                  | 66                   | 0              |
| <i>Yersinia kristensenii</i>        | C4TZT3_YERKR   | 461/440                  | 46                  | 66                   | 0              |
| <i>Yersinia mollaretii</i>          | C4SDP3_YERMO   | 472/440                  | 46                  | 66                   | 0              |
| <i>Yersinia pestis</i>              | Q0WKQ8_YERPE   | 461/440                  | 46                  | 66                   | 0              |
| <i>Yersinia pseudotuberculosis</i>  | Q66GF1_YERPS   | 461/440                  | 46                  | 66                   | 0              |
| <i>Yersinia ruckeri</i>             | C4UL97_YERRU   | 479/440                  | 46                  | 66                   | 0              |
| <i>Aeromonas salmonicida</i>        | A4SKE4_AERS4   | 465/441                  | 45                  | 66                   | 0              |
| <i>Aurantimonas</i>                 | gb EAS48987.1  | 464/441                  | 45                  | 66                   | 0              |

|                                      |              |         |    |    |   |
|--------------------------------------|--------------|---------|----|----|---|
| <i>Burkholderia cepacia</i>          | B4EG80_BURCJ | 429/424 | 45 | 66 | 0 |
| <i>Citrobacter koseri</i>            | A8ARP1_CITK8 | 468/440 | 45 | 66 | 0 |
| <i>Dickeya dadantii</i>              | C6C697_DICDC | 462/442 | 45 | 66 | 0 |
| <i>Enterobacter cancerogenus</i>     | B6FFT6_9ENTR | 463/440 | 45 | 66 | 0 |
| <i>Enterobacter sakazakii</i>        | A7MQC0_ENTS8 | 468/440 | 45 | 65 | 0 |
| <i>Escherichia albertii</i>          | B1EHY8_9ESCH | 463/440 | 45 | 65 | 0 |
| <i>Escherichia coli O157:H7</i>      | YICE_ECO57   | 463/440 | 45 | 65 | 0 |
| <i>Escherichia fergusonii</i>        | B7LVL7_ESCF3 | 463/440 | 45 | 65 | 0 |
| <i>Klebsiella pneumoniae</i>         | B5XTD2_KLEP3 | 463/442 | 45 | 66 | 0 |
| <i>Manganese-oxidizing bacterium</i> | Q1YFI6_MOBAS | 464/441 | 45 | 66 | 0 |
| <i>Pantoea sp.</i>                   | C8QC53_9ENTR | 459/442 | 45 | 66 | 0 |
| <i>Pectobacterium carotovorum</i>    | C6DJC9_PECCP | 462/440 | 45 | 66 | 0 |
| <i>Pectobacterium wasabiae</i>       | C6NCY9_9ENTR | 462/440 | 45 | 66 | 0 |
| <i>Photorhabdus asymbiotica</i>      | C7BGV4_9ENTR | 461/440 | 45 | 67 | 0 |
| <i>Prevotella melaninogenica</i>     | C5VGX0_9BACT | 447/438 | 45 | 65 | 0 |
| <i>Providencia stuartii</i>          | B2PUP3_PROST | 460/443 | 45 | 66 | 1 |
| <i>Pseudomonas entomophila</i>       | Q1IBC2_PSEE4 | 459/439 | 45 | 66 | 0 |
| <i>Pseudomonas mendocina</i>         | A4XYN0_PSEMY | 458/439 | 45 | 66 | 0 |
| <i>Pseudomonas putida</i>            | B0KLW0_PSEPG | 459/444 | 45 | 66 | 0 |
| <i>Pseudomonas syringae</i>          | Q48D16_PSE14 | 465/458 | 45 | 65 | 0 |
| <i>Salmonella arizonae</i>           | A9MKL8_SALAR | 466/440 | 45 | 66 | 0 |
| <i>Serratia proteamaculans</i>       | A8GLH5_SERP5 | 466/440 | 45 | 66 | 0 |
| <i>Shewanella halifaxensis</i>       | B0TLJ0_SHEHH | 482/449 | 45 | 70 | 0 |
| <i>Shigella dysenteriae</i>          | B3WW71_SHIDY | 463/440 | 45 | 65 | 0 |
| <i>Vibrio campbellii</i>             | A8T6H7_9VIBR | 463/443 | 45 | 67 | 0 |
| <i>Vibrio cholerae</i>               | A2PTP7_VIBCH | 468/446 | 45 | 67 | 0 |
| <i>Yersinia aldovae</i>              | C4UBZ6_YERAL | 461/440 | 45 | 65 | 0 |
| <i>Yersinia rohdei</i>               | C4UTL8_YERRO | 461/440 | 45 | 66 | 0 |
| <i>Acinetobacter radioresistens</i>  | C6RL26_ACIRA | 456/452 | 44 | 66 | 1 |
| <i>Acinetobacter sp.</i>             | Q6FE95_ACIAD | 457/438 | 44 | 66 | 0 |
| <i>Aeromonas hydrophila</i>          | A0KHR3_AERHH | 465/441 | 44 | 65 | 0 |
| <i>Burkholderia ambifaria</i>        | Q0BA61_BURCM | 462/438 | 44 | 65 | 0 |
| <i>Burkholderia cenocepacia</i>      | Q1BMA6_BURCA | 462/446 | 44 | 65 | 0 |
| <i>Burkholderia multivorans</i>      | A9ALZ0_BURM1 | 462/446 | 44 | 65 | 0 |
| <i>Burkholderia sp.</i>              | Q394B7_BURS3 | 462/446 | 44 | 65 | 0 |
| <i>Burkholderia thailandensis</i>    | Q2SZT8_BURTA | 462/445 | 44 | 66 | 0 |
| <i>Citrobacter sp.</i>               | C1MDV6_9ENTR | 463/440 | 44 | 65 | 0 |
| <i>Citrobacter youngae</i>           | C2AXS6_9ENTR | 468/440 | 44 | 65 | 0 |
| <i>Edwardsiella ictaluri</i>         | C5B9A8_EDWI9 | 481/441 | 44 | 65 | 0 |
| <i>Enterobacter sp.</i>              | A4W4Y3_ENT38 | 464/448 | 44 | 66 | 0 |
| <i>Escherichia coli SMS-3-5</i>      | B1LK91_ECOSM | 463/440 | 44 | 65 | 0 |
| <i>Marinomonas sp.</i>               | A3Y6S5_9GAMM | 482/460 | 44 | 64 | 1 |
| <i>Photobacterium profundum</i>      | Q1Z2L2_PHOPR | 459/439 | 44 | 65 | 0 |
| <i>Photobacterium sp.</i>            | Q2BYF9_9GAMM | 467/447 | 44 | 66 | 0 |
| <i>Photorhabdus luminescens</i>      | Q7N9R7_PHOLL | 461/442 | 44 | 67 | 0 |
| <i>Pseudomonas syringae</i>          | Q4ZYM6_PSEU2 | 465/457 | 44 | 64 | 0 |
| <i>Salmonella choleraesuis</i>       | Q57I85_SALCH | 463/440 | 44 | 66 | 0 |
| <i>Salmonella enterica</i>           | B5NDY7_SALET | 463/440 | 44 | 66 | 0 |
| <i>Salmonella typhi</i>              | Q8XF42_SALTI | 463/440 | 44 | 66 | 0 |
| <i>Shigella boydii</i>               | B2TTY4_SHIB3 | 463/440 | 44 | 65 | 0 |
| <i>Vibrio alginolyticus</i>          | Q1VAN3_VIBAL | 462/453 | 44 | 66 | 0 |
| <i>Vibrio cholerae</i>               | C2C5Q8_VIBCH | 478/456 | 44 | 66 | 0 |
| <i>Vibrio fischeri</i>               | Q5E8N5_VIBF1 | 463/439 | 44 | 66 | 0 |
| <i>Vibrio harveyi</i>                | A6AR91_VIBHA | 463/448 | 44 | 67 | 0 |
| <i>Vibrio parahaemolyticus</i>       | Q87TB4_VIBPA | 470/452 | 44 | 66 | 0 |

|                                          |              |         |    |    |   |
|------------------------------------------|--------------|---------|----|----|---|
| <i>Vibrio</i> sp.                        | A7K0Y9_9VIBR | 462/453 | 44 | 66 | 0 |
| <i>Acinetobacter baumannii</i>           | B7I870_ACIB5 | 452/438 | 43 | 66 | 0 |
| <i>Burkholderia glumae</i>               | C5AKR9_BURGB | 56/438  | 43 | 65 | 0 |
| <i>Burkholderia mallei</i>               | Q62II2_BURMA | 462/446 | 43 | 66 | 0 |
| <i>Burkholderia pseudomallei</i>         | Q63VV9_BURPS | 462/446 | 43 | 66 | 0 |
| <i>Campylobacter lari</i>                | B9KFN7_CAMLR | 453/439 | 43 | 66 | 0 |
| <i>Klebsiella pneumoniae</i>             | B6D1N5_KLEPN | 459/448 | 43 | 64 | 2 |
| <i>Photobacterium profundum</i>          | Q6LVQ0_PHOPR | 459/439 | 43 | 65 | 0 |
| <i>Pseudoalteromonas atlantica</i>       | Q15TP7_PSEA6 | 486/450 | 43 | 65 | 1 |
| <i>Psychrobacter cryohalolentis</i>      | Q1Q9G3_PSYCK | 468/453 | 43 | 66 | 0 |
| <i>Chromohalobacter salexigens</i>       | Q1QWM1_CHRSD | 484/460 | 42 | 62 | 5 |
| <i>Klebsiella oxytoca</i>                | B5B0J7_KLEOX | 460/447 | 42 | 62 | 1 |
| <i>Klebsiella pneumoniae</i>             | C8T9U9_KLEPR | 465/452 | 42 | 63 | 2 |
| <i>Pantoea</i> sp.                       | C8Q9J9_9ENTR | 458/454 | 42 | 63 | 1 |
| <i>Vibrio shilonii</i>                   | A6D2E9_9VIBR | 460/438 | 42 | 65 | 0 |
| <i>Alteromonas macleodii</i>             | B4RSN4_ALTMD | 517/445 | 41 | 64 | 0 |
| <i>Sagittula stellata</i>                | A3JYA4_9RHOB | 470/464 | 40 | 62 | 0 |
| <i>Petrogona mobilis</i>                 | A9BIT1_PETMO | 452/447 | 39 | 63 | 2 |
| <i>Actinobacillus succinogenes</i>       | A6VQK4_ACTSZ | 435/437 | 37 | 57 | 3 |
| <i>Ralstonia eutropha</i>                | Q0K146_RALEH | 443/439 | 37 | 57 | 3 |
| <i>Teredinibacter turnerae</i>           | C5BIN9_TERTT | 470/434 | 37 | 58 | 0 |
| <i>Comamonas testosteroni</i>            | B7WUD5_COMTE | 450/439 | 36 | 56 | 3 |
| <i>Cupriavidus taiwanensis</i>           | B3RAE8_CUPTR | 443/439 | 36 | 57 | 3 |
| <i>Haloarcula marismortui</i>            | Q5V695_HALMA | 468/442 | 36 | 58 | 3 |
| <i>Mannheimia haemolytica</i>            | A7JUF6_PASHA | 439/437 | 36 | 56 | 3 |
| <i>Natrialba magadii</i>                 | B9ZGA8_NATMA | 470/450 | 36 | 55 | 1 |
| <i>Shewanella benthica</i>               | A9D3H0_9GAMM | 465/436 | 36 | 59 | 3 |
| uncultured haloarchaeon                  | A5YS00_9EURY | 491/444 | 36 | 59 | 3 |
| <i>Acidaminococcus</i> sp.               | C0WAN0_9FIRM | 439/447 | 35 | 53 | 3 |
| <i>Actinobacillus minor</i>              | C8KZ21_9PAST | 430/437 | 35 | 57 | 3 |
| <i>Actinobacillus pleuropneumoniae</i>   | A3N185_ACTP2 | 430/438 | 35 | 57 | 3 |
| <i>Clostridium botulinum</i>             | C6DXR0_CLOBO | 447/445 | 35 | 54 | 4 |
| <i>Clostridium butyricum</i>             | C4IFT3_CLOBU | 440/437 | 35 | 58 | 3 |
| <i>Colwellia psychrerythraea</i>         | Q481N1_COLP3 | 449/440 | 35 | 57 | 3 |
| <i>Delftia acidovorans</i>               | A9BY97_DELAS | 438/439 | 35 | 56 | 3 |
| <i>Fusobacterium varium</i>              | C6JK26_FUSVA | 450/448 | 35 | 58 | 2 |
| <i>Haemophilus ducreyi</i>               | Q7VKR1_HAEDU | 430/438 | 35 | 57 | 3 |
| <i>Laribacter hongkongensis</i>          | C1D7Z5_LARHH | 435/438 | 35 | 56 | 3 |
| <i>Mannheimia succiniciproducens</i>     | Q65V28_MANSM | 435/446 | 35 | 56 | 3 |
| <i>Marinobacter algicola</i>             | A6EZ23_9ALTE | 468/431 | 35 | 54 | 4 |
| <i>Ralstonia metallidurans</i>           | Q1LGX9_RALME | 445/438 | 35 | 56 | 3 |
| <i>Sebaldella termitidis</i>             | C4BV69_9FUSO | 450/445 | 35 | 54 | 3 |
| <i>Thermanaerovibrio acidaminovorans</i> | C4ESW5_9BACT | 451/439 | 35 | 56 | 3 |
| <i>Verrucomicrobiae bacterium</i>        | B5JCP5_9BACT | 425/427 | 35 | 57 | 3 |
| <i>Clostridium acetobutylicum</i>        | Q97KP5_CLOAB | 435/437 | 34 | 57 | 3 |
| <i>Photobacterium profundum</i>          | Q6LQU1_PHOPR | 493/436 | 34 | 56 | 3 |
| <i>Shewanella halifaxensis</i>           | B0TSQ8_SHEHH | 468/436 | 34 | 58 | 3 |
| <i>Vibrio shilonii</i>                   | A6CVS4_9VIBR | 467/454 | 34 | 57 | 4 |
| <i>Alkaliphilus metalliredigens</i>      | A6TKW3_ALKMQ | 451/445 | 33 | 53 | 4 |
| <i>Anaerococcus prevotii</i>             | C7RE35_ANAPD | 449/454 | 33 | 53 | 5 |
| <i>Bacillus coagulans</i>                | C1PF47_BACCO | 437/435 | 33 | 54 | 4 |
| <i>Bacillus licheniformis strain</i>     | Q65I87_BACLD | 438/420 | 33 | 52 | 4 |
| <i>Bacillus subtilis</i>                 | PBUX_BACSU   | 438/430 | 33 | 52 | 4 |
| <i>Bacteroides pectinophilus</i>         | B7AS73_9BACE | 457/447 | 33 | 54 | 3 |
| <i>Clostridium botulinum</i>             | B2V3D4_CLOBA | 454/441 | 33 | 56 | 4 |

|                                        |              |         |    |    |   |
|----------------------------------------|--------------|---------|----|----|---|
| <i>Clostridium sp.</i>                 | C1I4U8_9CLOT | 454/439 | 33 | 55 | 3 |
| <i>Desulfotalea psychrophila</i>       | Q6AND3_DESPS | 457/431 | 33 | 54 | 3 |
| <i>Eubacterium bifforme</i>            | B7CE72_9FIRM | 435/438 | 33 | 55 | 3 |
| <i>Eubacterium ventriosum</i>          | A5Z9F2_9FIRM | 453/447 | 33 | 54 | 4 |
| <i>Exiguobacterium sibiricum</i>       | B1YHS2_EXIS2 | 435/417 | 33 | 52 | 4 |
| <i>Exiguobacterium sp.</i>             | C4LOT8_EXISA | 434/437 | 33 | 52 | 5 |
| <i>Fibrobacter succinogenes</i>        | C5ULK6_FIBSU | 434/440 | 33 | 53 | 3 |
| <i>Geobacillus sp.</i>                 | B3K4T7_9BACI | 453/451 | 33 | 50 | 4 |
| <i>Geobacillus thermodenitrificans</i> | A4IN64_GEOTN | 435/435 | 33 | 54 | 5 |
| <i>Jannaschia sp.</i>                  | Q28P39_JANSC | 478/444 | 33 | 51 | 6 |
| <i>Labrenzia aggregata</i>             | A0NUV6_9RHOB | 478/440 | 33 | 53 | 4 |
| <i>Lactobacillus rhamnosus</i>         | C8UT52_LACRH | 442/417 | 33 | 51 | 4 |
| <i>Marinomonas sp.</i>                 | A3Y821_9GAMM | 442/439 | 33 | 56 | 3 |
| <i>Octadecabacter antarcticus</i>      | B5J964_9RHOB | 473/443 | 33 | 52 | 3 |
| <i>Oenococcus oeni</i>                 | A0NJH6_OENOE | 472/428 | 33 | 53 | 4 |
| <i>Parvularcula bermudensis</i>        | A3VU88_9PROT | 442/438 | 33 | 54 | 5 |
| <i>Rhodobacteraceae bacterium</i>      | B9NQ91_9RHOB | 475/446 | 33 | 52 | 4 |
| <i>Rhodobacterales bacterium</i>       | B6B3B5_9RHOB | 442/434 | 33 | 52 | 4 |
| <i>Roseobacter sp.</i>                 | A4ENL1_9RHOB | 477/442 | 33 | 53 | 4 |
| <i>Roseobacter sp.</i>                 | B7RKQ6_9RHOB | 474/440 | 33 | 53 | 4 |
| <i>Ruegeria sp.</i>                    | B7QQ92_9RHOB | 475/458 | 33 | 52 | 4 |
| <i>Shuttleworthia satelles</i>         | C4GB19_9FIRM | 443/451 | 33 | 53 | 3 |
| <i>Silicibacter pomeroyi</i>           | Q5LV28_SILPO | 470/440 | 33 | 54 | 4 |
| <i>Silicibacter sp.</i>                | Q1GLM1_SILST | 479/458 | 33 | 53 | 4 |
| <i>Sulfitobacter sp.</i>               | A3STN0_9RHOB | 480/447 | 33 | 53 | 4 |
| <i>Treponema vincentii</i>             | C8PPS8_9SPIO | 452/442 | 33 | 54 | 2 |
| <i>Vibrio shilonii</i>                 | A6CZ45_9VIBR | 469/443 | 33 | 54 | 3 |
| <i>Vibrio splendidus</i>               | A3UQN7_VIBSP | 483/443 | 33 | 56 | 3 |

A blast-p search (Altschul et al., 2005) using XanQ as a query sequence (EcoGENE: EG13065) run on November 13, 2009, the pool of 840 best hits retrieved was checked for redundancy and, after omission of identical entries, we ended up with 188 homologs sharing a sequence identity of  $\geq 33\%$  with XanQ (see also Karena and Frillingos, 2009). These homologs are presented in the table with respect to their amino acid length, effective length used in the alignment, and their identity and similarity scores. Sequence alignments at the TM3 region were used for Table S3.

#### References used in Table S2

- Altschul, S. F., Wootton, J. C., Gertz, E. M., Agarwala, R., Morgulis, A., Schäffer, A. A., and Yu, Y.-K. (2005). *FEBS J.* **272**, 5101-5109.
- Karena, E., and Frillingos, S. (2009). *J. Biol. Chem.* **284**, 24257-24268.
